# Supplementary material
Source: PubMed Central journal article supplement (PMC7572653)
Supplement: NIHMS1616934-supplement-Supplementary_file_B.pdf [file NIHMS1616934-supplement-Supplementary_file_B.pdf]

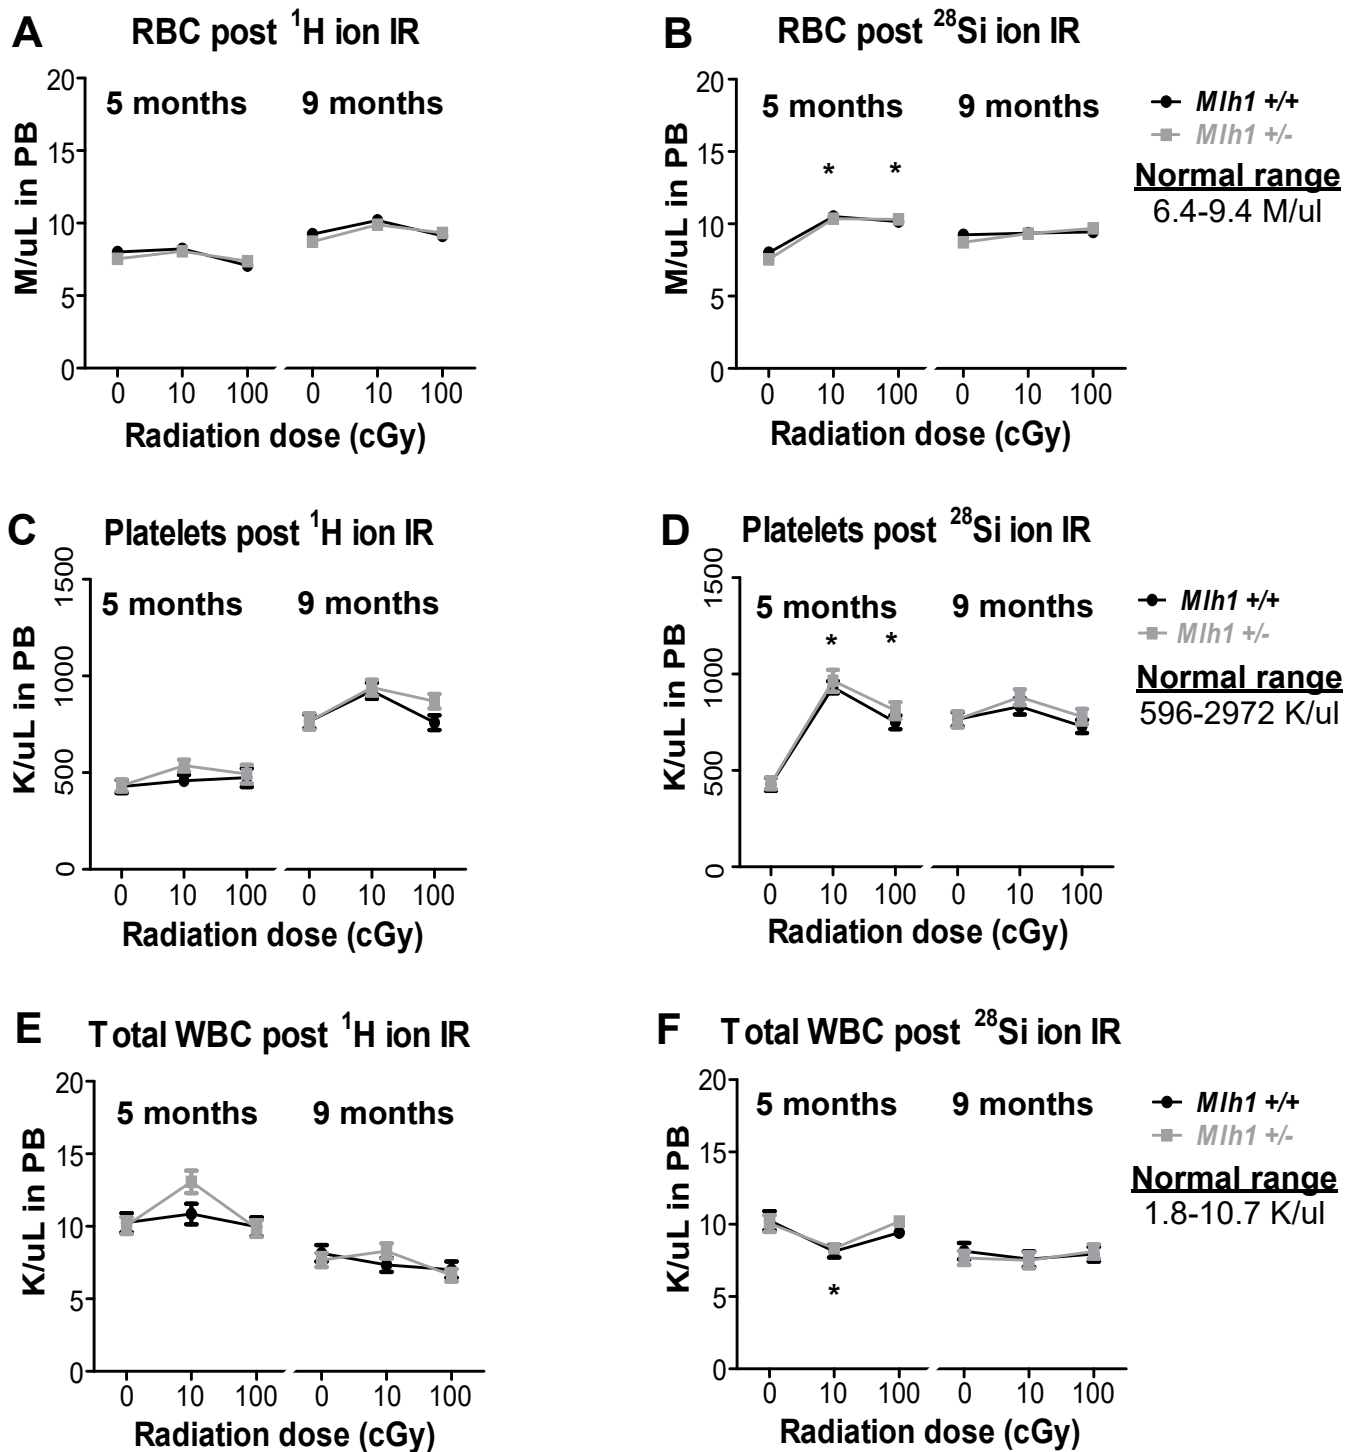

**Supplementary figure 1:** HSC differentiation measured by complete blood counts (CBC). (A) Total RBCs (M/ $\mu\text{L}$ ), (C) Platelets (K/ $\mu\text{L}$ ), and (E) WBCs (K/ $\mu\text{L}$ ) at 5 months and 9 months post 0 cGy, 10 cGy, or 100 cGy of  $^1\text{H}$  ion irradiated *Mih1*<sup>+/+</sup> or *Mih1*<sup>+/-</sup> mice (36-44 mice per each cohort). (B) Total RBCs (M/ $\mu\text{L}$ ), (D) Platelets (K/ $\mu\text{L}$ ), and (F) WBCs (K/ $\mu\text{L}$ ) at 5 months and 9 months post 0 cGy, 10 cGy, or 100 cGy of  $^{28}\text{Si}$  ion irradiated *Mih1*<sup>+/+</sup> or *Mih1*<sup>+/-</sup> mice (36-42 mice per each cohort). Data are means  $\pm$  standard error of means. \* =  $p < 0.0001$ .

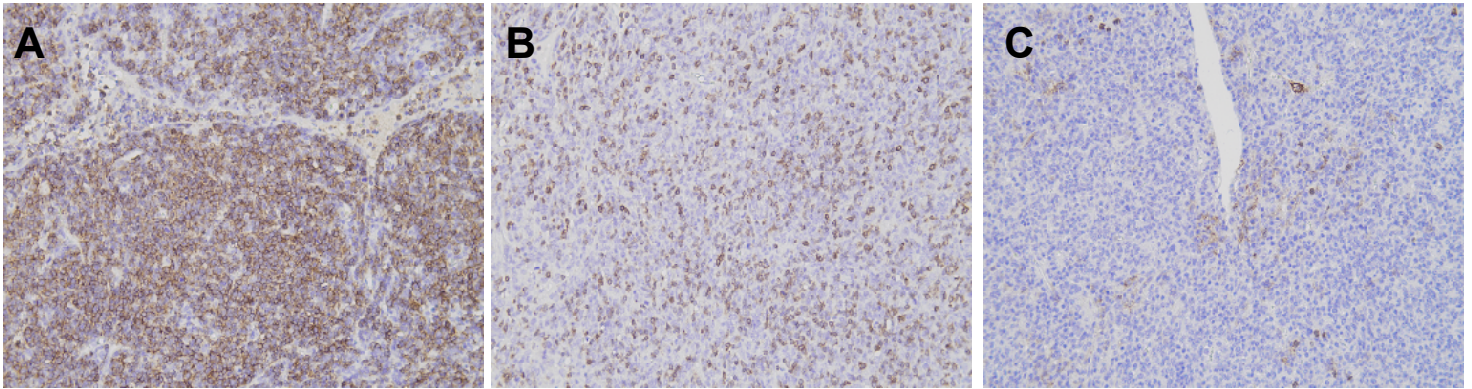

**D** *Mlh1*<sup>+/+</sup> mice lymphoma distribution

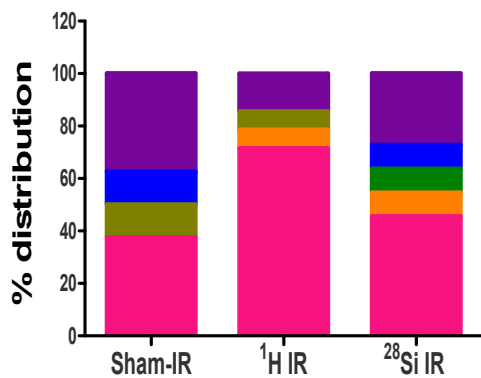

**E** *Mlh1*<sup>+/-</sup> mice lymphoma distribution

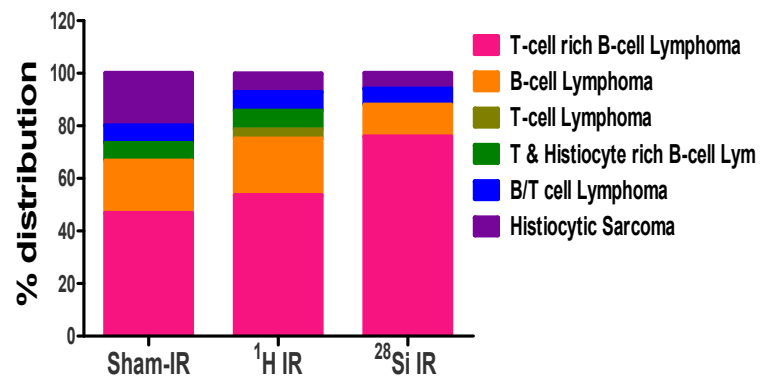

**Supplementary figure 2:** Immunohistochemistry of lymphomas arising from *Mlh1*<sup>+/+</sup> and *Mlh1*<sup>+/-</sup> mice. (A-C) The majority of lymphomas had an immunophenotype of T-cell rich B-cell (TRB) lymphomas, characterized by a dominant population of lymphoma cells stained positive for B-cell by B220 antibody (A), with enriched infiltrating T-cells presence found by CD3 antibody (B), and only a few resident macrophages presence found by F4/80 antibody (C) (20X). Distribution based on immunohistochemistry of lymphomas collected from (D) *Mlh1*<sup>+/+</sup> mice, and (E) *Mlh1*<sup>+/-</sup> mice exposed to sham, <sup>1</sup>H ion, or <sup>28</sup>Si ion irradiation. IHC was performed on 8-14 lymphomas of *Mlh1*<sup>+/+</sup> origin and 15-33 lymphomas of *Mlh1*<sup>+/-</sup> origin.

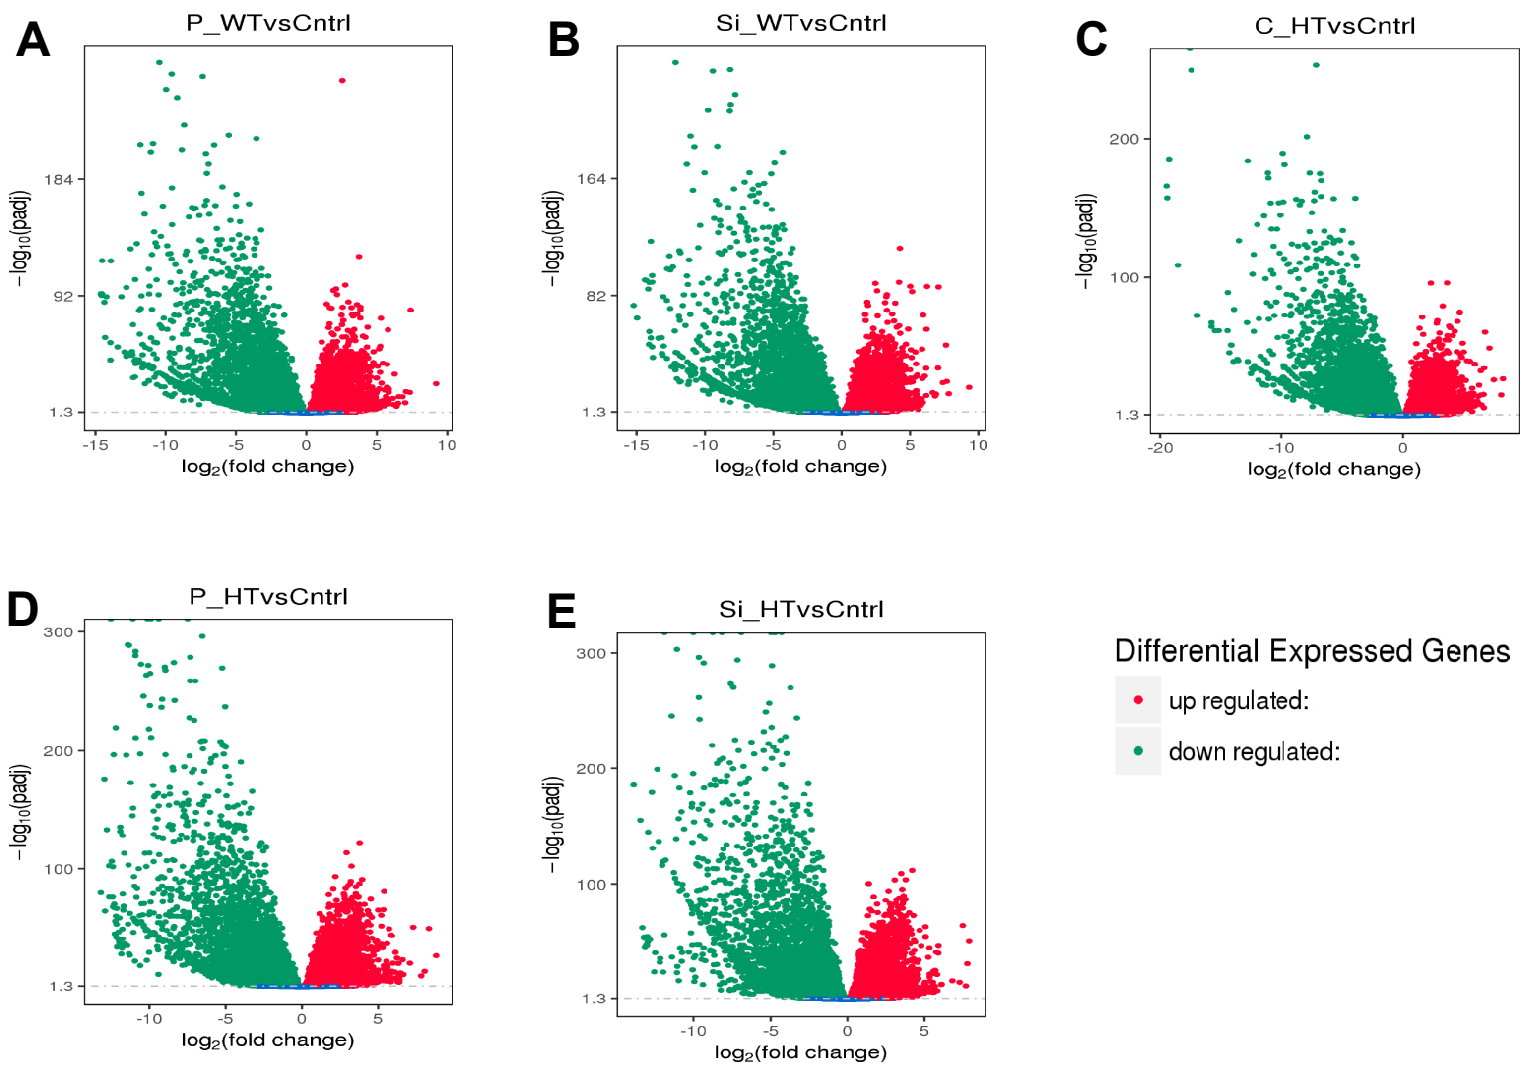

**Supplementary figure 3:** Volcano plots represent the whole distribution of differentially expressed genes in TRB lymphomas arising from (A)  $^1\text{H}$  ion irradiated *Mlh1*<sup>+/+</sup> mice, (B)  $^{28}\text{Si}$  ion irradiated *Mlh1*<sup>+/+</sup> mice, (C) sham irradiated *Mlh1*<sup>+/-</sup> mice, (D)  $^1\text{H}$  ion irradiated *Mlh1*<sup>+/-</sup> mice, and (E)  $^{28}\text{Si}$  ion irradiated *Mlh1*<sup>+/-</sup> mice. C\_HT - sham irradiated *Mlh1*<sup>+/-</sup> cohort; P\_HT -  $^1\text{H}$  ion irradiated *Mlh1*<sup>+/-</sup> cohort; Si\_HT -  $^{28}\text{Si}$  ion irradiated *Mlh1*<sup>+/-</sup> cohort; P\_WT -  $^1\text{H}$  ion irradiated *Mlh1*<sup>+/+</sup> cohort; Si\_WT -  $^{28}\text{Si}$  ion irradiated *Mlh1*<sup>+/+</sup> cohort; Cntrl - control.
